# Supplementary material for: Stepwise interfacial self-assembly of nanoparticles via specific DNA pairing
Source: Royal Society of Chemistry journal article supplement (doi:10.1039/b705094a), 2007-01-01
Supplement: b705094a.pdf [file b705094a.pdf]

# Stepwise Interfacial Self-Assembly of Nanoparticles via Specific DNA Pairing

Bo Wang,<sup>a,b</sup> Miao Wang,<sup>c</sup> Hao Zhang,<sup>b</sup> Nelli S. Sobal,<sup>d</sup> Weijun Tong,<sup>a</sup> Changyou Gao,<sup>a,\*</sup> Yanguang Wang,<sup>c</sup> Michael Giersig,<sup>d</sup> Dayang Wang,<sup>b,\*</sup> and Helmuth Möhwald<sup>b</sup>

<sup>a</sup> Department of Polymer Science and Engineering, Zhejiang University, Hangzhou 310027, P. R. China. E-mail: cygao@mail.hz.zj.cn and Fax: 86 571 87951948.

<sup>b</sup> Max Planck Institute of Colloids and Interfaces, D-14424, Potsdam, Germany. Email: dayang.wang@mpikg-golm.mpg.de and Fax: 49 331 5679202.

<sup>c</sup> Department of Chemistry, Zhejiang University, Hangzhou 310027, P. R. China.

<sup>d</sup> Center of Advanced European Studies and Research, D-53175, Bonn, Germany.

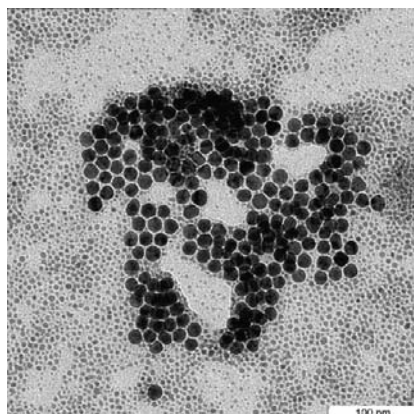

**Figure S1.** TEM image of a Ag/Au NP bilayer, obtained by sonicating them for 1 h after transferred from the water/toluene interface. The black large dots are 12 nm Au NPs while the grey small dots 6 nm Ag NPs. The sonication caused detachment of the Au NPs rather than Ag NPs, suggesting a bilayer character of the resulting films.

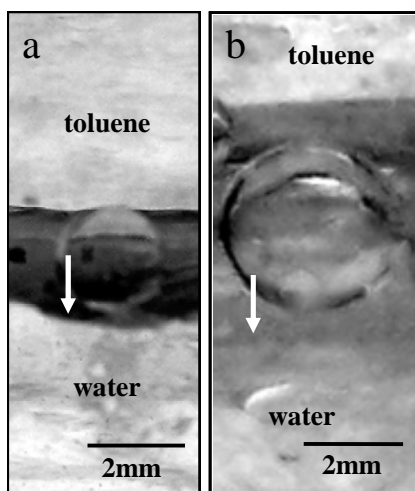

**Figure S2.** Photographs of water droplets of 20  $\mu\text{L}$  and 200  $\mu\text{L}$  in volume, standing on a Ag/Au NP bilayer (a) and a Ag/Au/CdTe NP trilayer (b), self-assembled at the water/toluene interface. The upper phase is toluene and the lower phase water. The interface is highlighted by arrows.
